# Supplementary material
Source: PubMed Central journal article supplement (PMC7171240)
Supplement: IAI.00051-20-s0001.pdf [file IAI.00051-20-s0001.pdf]

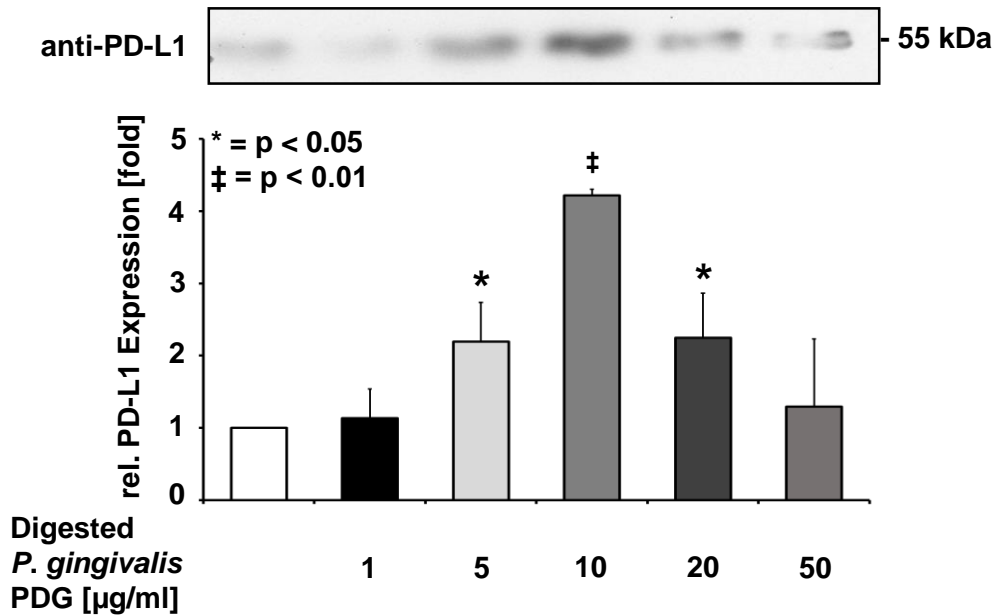

Supp. Fig. 1

**Fig. S1.** SCC-25 cells were treated with indicated concentrations of mutanolysin-digested *P. gingivalis* PDG. After 1 day, cells were harvested and equal amounts of protein contained in cell lysates were used for Western blotting using PD-L1 antibodies. Triplicates of the Western blots were used for protein quantification using the Image J software. Protein amounts in untreated cells were arbitrarily set as 1, the error bars show standard deviations,  $p$ -values are indicated.

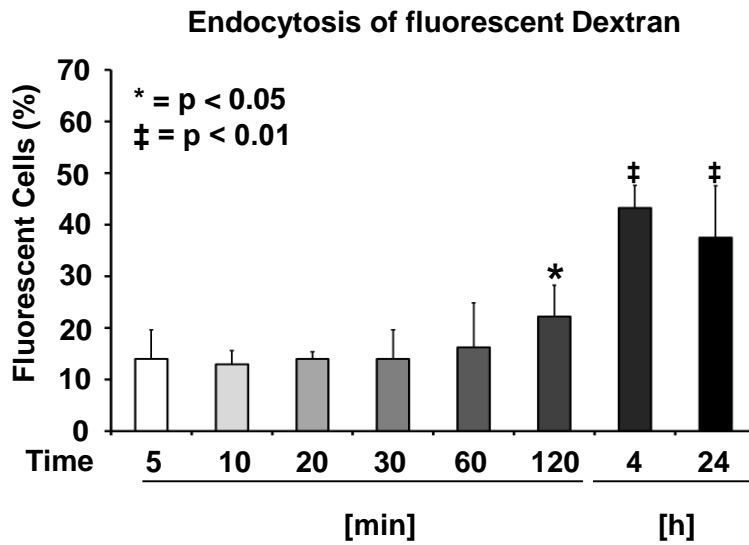

Supp. Fig. 2

**Fig. S2.** SCC-25 cells were incubated for the indicated time periods with fluorescently labelled dextran, followed by the analysis of dextran uptake using flow cytometry. Error bars indicate standard deviations from three independent experiments.

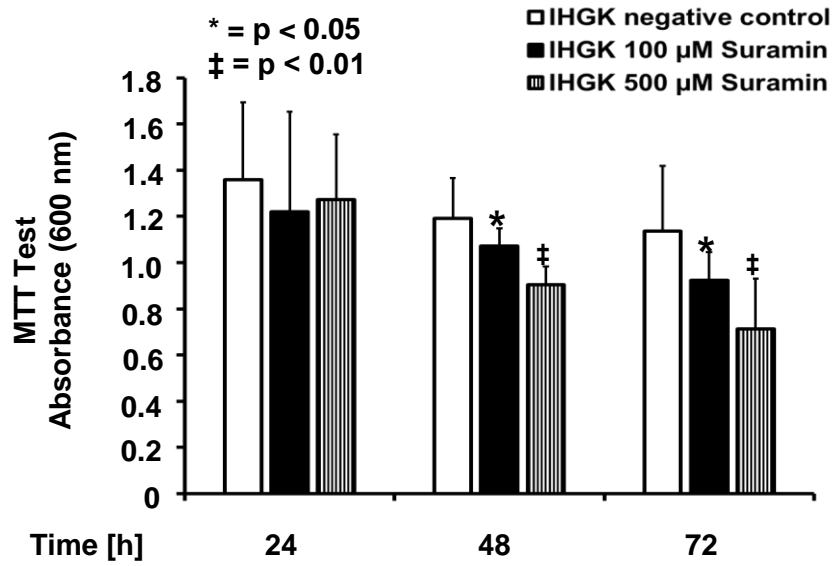

Supp. Fig. 3

**Fig. S3.** The effect of suramin on the proliferation characteristics of immortalized human gingival keratinocytes (IHGK) is shown by MTT test. Cells were treated with vehicle or suramin at the indicated concentration as shown. Cells were lysed and viability was scored by an MTT test, error bars show standard deviations ( $n = 9$ ).

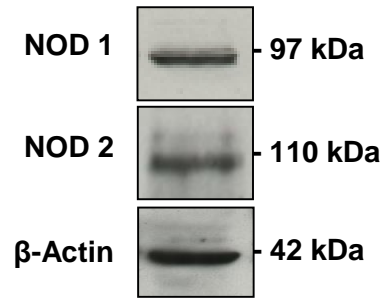

Supp. Fig. 4

**Fig. S4.** Lysates from SCC-25 cells were tested for the expression of NOD1 and NOD2 proteins by Western blotting, a representative experiment is shown.
